# Supplementary material
Source: Springer Nature journal article supplement (https://www.springermedizin.de/resource/supplementary/12883_2013_1151_MOESM6_ESM.pdf/9456580)

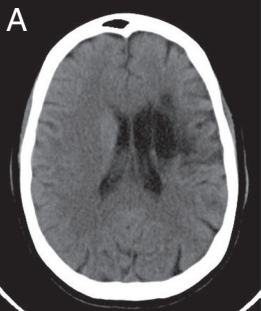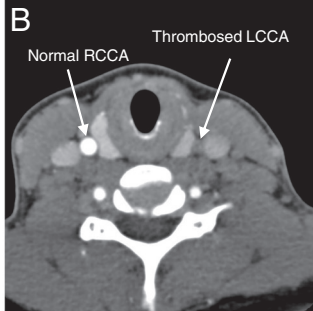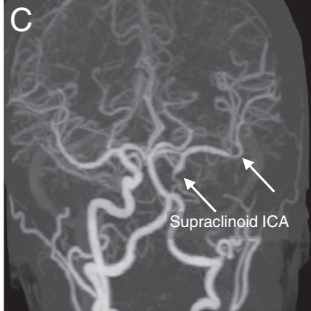

Supplement: MOESM6 [file 9456580]
